# Supplementary material for: High Permittivity Polymer Composites on the Basis of Long Single-Walled Carbon Nanotubes: The Role of the Nanotube Length
Source: MDPI journal article supplement (doi:10.3390/nano12193538), 2022-10-10
Supplement: s1 [file s1]

## Supporting Information

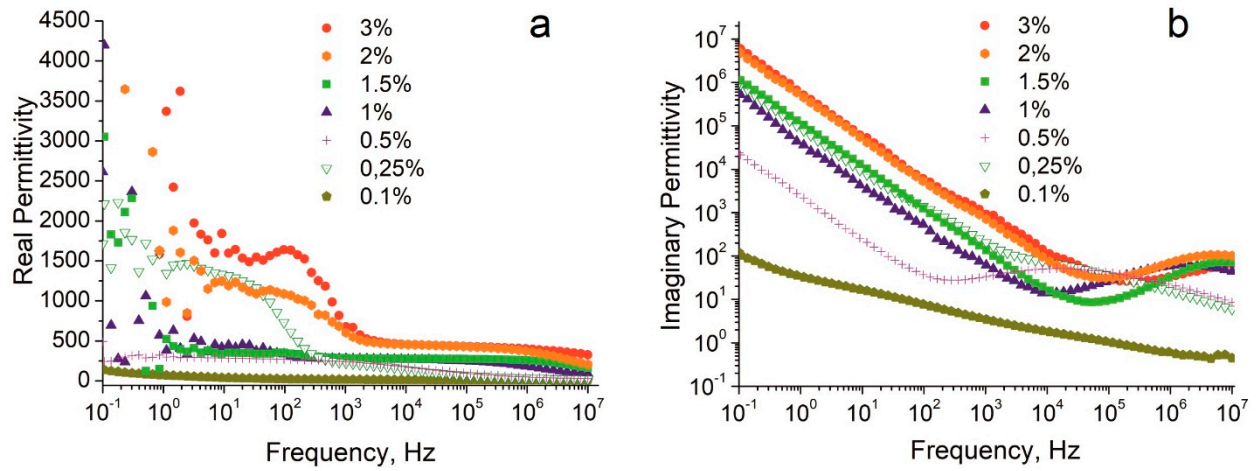

**Figure S1.** Frequency dependences of the real (a) and imaginary (b) parts of the complex permittivity for composites with different filler contents in the low-frequency region.

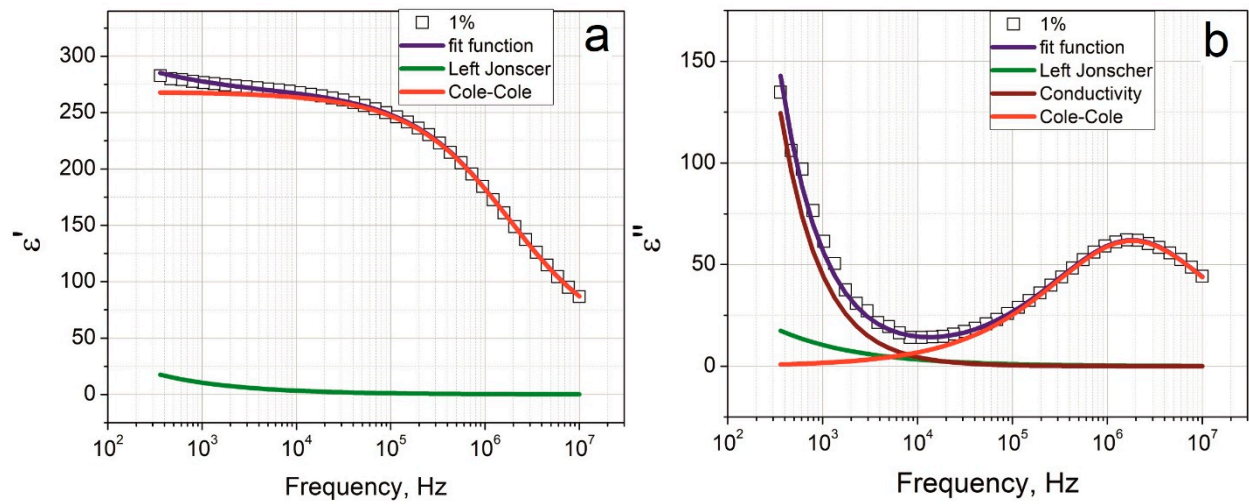

**Figure S2.** Approximation of the dielectric spectrum by the equation (1) for a sample with a filler content of 1%, (a) real part, and (b) imaginary part. The violet line is the fitting function; the green line is the Jonscher parameter; the brown line is DC-conductivity; the red line is the Cole-Cole function.

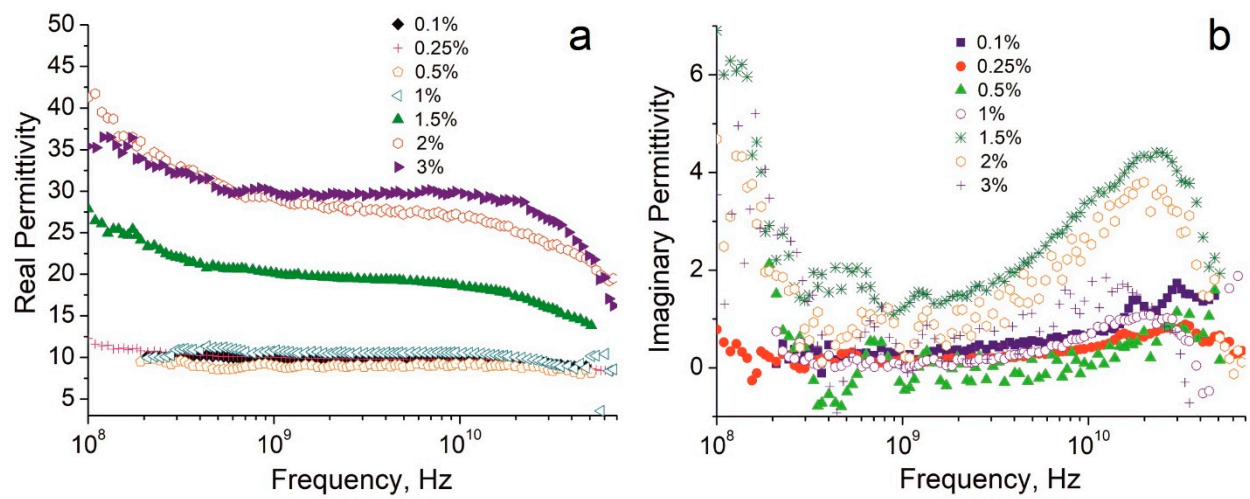

**Figure S3.** Frequency dependences of the real (a) and imaginary (b) parts of the complex permittivity for composites with different filler contents in the ultra-high frequency region.
